# Supplementary material for: Efficient Azo Dye Biodecolorization System Using Lignin-Co-Cultured White-Rot Fungus
Source: J Fungi (Basel). 2023 Jan 7;9(1):91. doi: 10.3390/jof9010091 (PMC9866751; doi:10.3390/jof9010091)
Supplement: Supplementary file 1 [file jof-09-00091-s001.zip › jof-2099673-supplementary.pdf]

## **Supplementary Materials**

### **Efficient Azo Dye Biodecolorization System Using Lignin Co-Cultured White-Rot Fungus**

Su Sun <sup>1,2,\*</sup>, Pengyang Liu <sup>2</sup> and Mati Ullah <sup>2</sup>

<sup>1</sup> College of Urban Construction, Wuchang Shouyi University, Wuhan 430064, China

<sup>2</sup> Key Laboratory of Molecular Biophysics of MOE, Department of Biotechnology, College of Life Science and Technology, Huazhong University of Science and Technology, Wuhan 430074, China

\* Correspondence: sunsu@hust.edu.cn

## Supplementary Figure S1

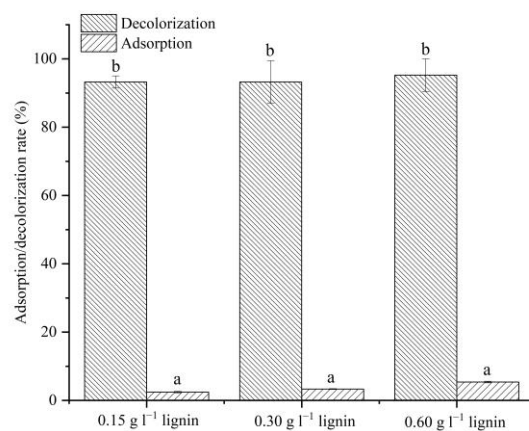

**Figure S1.** The comparison of DR5B adsorption and the DR5B decolorization of *G. lucidum* EN2 in the presence of different contents of alkali lignin (0.15, 0.30, and 0.60 g l<sup>-1</sup>) at 60 h. The vertical line on each bar indicates the standard deviation for three replicates (SD, n = 3). Different letters represent significant differences between treatment groups at each time point, as determined by two-way ANOVA followed by LSD or Tukey multiple comparison test ( $p < 0.05$ )

## Supplementary Figure S2

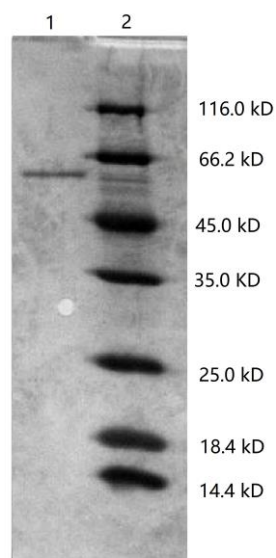

**Figure S2.** SDS-PAGE analyses of purified laccase of *G. lucidum* EN2. Lane 1: purified laccase; Lane 2: protein molecular mass marker.
